# Impact of intron removal from tRNA genes on *Saccharomyces cerevisiae*

Sachiko Hayashi<sup>1</sup>, Shunsuke Mori<sup>2</sup>, Takeo Suzuki<sup>3</sup>, Tsutomu Suzuki<sup>3</sup> and Tohru Yoshihisa<sup>1,\*</sup>

<sup>1</sup>Graduate School of Life Science, University of Hyogo, Ako-gun 678-1297, Japan, <sup>2</sup>Graduate School of Materials Science, Nagoya University, Nagoya 464-8602, Japan and <sup>3</sup>Graduate School of Engineering, University of Tokyo, Tokyo 113-8656, Japan

Received November 20, 2018; Revised March 28, 2019; Editorial Decision April 01, 2019; Accepted April 04, 2019

## ABSTRACT

In eukaryotes and archaea, tRNA genes frequently contain introns, which are removed during maturation. However, biological roles of tRNA introns remain elusive. Here, we constructed a complete set of *Saccharomyces cerevisiae* strains in which the introns were removed from all the synonymous genes encoding 10 different tRNA species. All the intronless strains were viable, but the tRNA<sup>Phe</sup><sub>GAA</sub> and tRNA<sup>Tyr</sup><sub>GUA</sub> intronless strains displayed slow growth, cold sensitivity and defective growth under respiratory conditions, indicating physiological importance of certain tRNA introns. Northern analyses revealed that removal of the introns from genes encoding three tRNAs reduced the amounts of the corresponding mature tRNAs, while it did not affect aminoacylation. Unexpectedly, the tRNA<sup>Leu</sup><sub>CAA</sub> intronless strain showed reduced 5.8S rRNA levels and abnormal nucleolar morphology. Because pseudouridine ( $\Psi$ ) occurs at position 34 of the tRNA<sup>Ile</sup><sub>UAU</sub> anticodon in an intron-dependent manner, tRNA<sup>Ile</sup><sub>UAU</sub> in the intronless strain lost  $\Psi$ 34. However, in a portion of tRNA<sup>Ile</sup><sub>UAU</sub> population, position 34 was converted into 5-carbamoylmethyluridine (ncm<sup>5</sup>U), which could reduce decoding fidelity. In summary, our results demonstrate that, while introns are dispensable for cell viability, some introns have diverse roles, such as ensuring proper growth under various conditions and controlling the appropriate anticodon modifications for accurate pairing with the codon.

## INTRODUCTION

tRNAs, well-known as central adapter molecules involved in protein translation, are a highly expressed class of small noncoding RNAs that constitute as much as 4–10% of total cellular RNAs (1). Despite their small body, tRNAs

receive extensive processing, including terminal trimming, CCA addition, nucleotide modifications and splicing (see below). For example, ~3 million cytosolic tRNA molecules are transcribed per generation from 275 tRNA genes dispersed throughout all the 16 chromosomes in the yeast *Saccharomyces cerevisiae*. The resulting primary transcripts must be properly matured in the same duration (2,3). Initially, tRNAs are synthesized in their precursor form with the 5'-leader and 3'-trailer sequences. Some pre-tRNAs in the eukaryotes and archaeobacteria contain one or a few introns. The number of eukaryotic tRNA species (defined by their anticodon sequence) that are produced from intron-containing precursors ranges from 2 to 52, and each of the 46 tRNA species in the mushroom, *Laccaria bicolor*, has at least one isodecoder with an intron (3). In most cases, such tRNA genes are interrupted by a single intron inserted at one nucleotide 3' to the anticodon, the so-called canonical position, whereas some tRNAs in archaeobacteria and certain eukaryotic algae harbor more diverse types of introns (4–6). Eubacterial tRNA genes seldom have introns, and such rare introns are Group I or Group II self-splicing introns, which are different from those of eukaryotes and archaeobacteria.

In *S. cerevisiae*, ~20% of the total tRNA genes encoding 10 different tRNA families contain a single intron with 14–60 nt length at the canonical position. These extra sequences must be removed before final maturation. Because the intron interferes with formation of the universally conserved structure of the anti-codon stem loop, splicing machinery, which mainly consists of tRNA-splicing endonuclease (Sen) and tRNA ligases (also 2'-phosphotransferase in fungi and plants), is essential for viability in various eukaryotes (7–11).

It has been a long mystery the reason why some tRNA genes have the introns. As described above, pre-tRNA splicing is a prerequisite for the function of tRNAs in translation, and the resulting introns are efficiently degraded by the sequential actions of tRNA ligase and Xrn1p, at least in *S. cerevisiae* (12). Unlike for mRNAs, alternative splic-

\*To whom correspondence should be addressed. Tel: +81 791 58 0174; Fax: +81 791 58 0180; Email: tyoshihi@sci.u-hyogo.ac.jp

ing of pre-tRNAs is very rare. The archaebacterium, *Caldivirga maquilingsensis*, utilizes splicing to produce three different isoacceptors of tRNA<sup>Gly</sup> from five split tRNA fragments (13). In this case, one common 3'-fragment (38–3' end) is joined with one or two fragments consisting of the 5' halves. However, in the eukaryotes, interruption of tRNA genes with the intron does not enable production of more diverse transcripts from the limited number of tRNA genes. Some introns contribute to nucleotide modifications of the mature part of tRNAs. In another archaebacterium *Haloferax volcanii*, a box C/D small RNA is nested in the intron of tRNA<sup>Trp</sup><sub>CCA</sub>, and the intronic part of pre-tRNA<sup>Trp</sup> or the excised intron is used to select nucleotides C34 and U39 on tRNA<sup>Trp</sup> for 2'-O-methylation (14). *In vitro* modification assays using cell extracts demonstrated that yeast tRNA-pseudouridine synthase Pus1p only accepts the intron-containing pre-tRNA<sup>Ile</sup><sub>UAU</sub> for its pseudouridylation of U34 and U36 (15,16). Notably, the same enzyme can catalyze pseudouridylation of U27 on both the pre- and mature tRNAs. In addition, tRNA methyltransferase Trm4p in yeast and humans catalyzes intron-dependent m<sup>5</sup>C formation at C34 on tRNA<sup>Leu</sup><sub>CAA</sub> and that at C40 on tRNA<sup>Phe</sup><sub>GAA</sub> in yeast (17,18). Indeed, the position of 34 on the tRNAs base-pairs with the wobble position of the codon, and some modifications of position 34 affect accuracy and/or efficiency of decoding (19,20). However, deletion of the *PUS1* gene or the *TRM4* gene is not lethal in *S. cerevisiae*, indicating that these modifications are not essential for yeast growth or decoding by these tRNAs.

Another interesting point is that the presence or absence of an intron seems to be common among all synonymous genes encoding an isoacceptor or an isodecoder tRNA. For example, in *S. cerevisiae* and *Schizosaccharomyces pombe*, there is no isoacceptor consisting of mixed isodecoders with and without the intron on their genomes. Among the organisms with more complex genome structures, certain tRNA species are encoded by both intron-containing and intronless genes, although these two types of genes tend to derive from different origins, as occurs for tRNA<sup>Tyr</sup><sub>GUA</sub> in *Arabidopsis thaliana* and tRNA<sup>Leu</sup><sub>CAA</sub> in *Homo sapiens*. Thus, there might be an unknown system or selective pressure to maintain or exclude the introns in whole synonymous tRNA genes encoding certain isoacceptor/isodecoders on the genome.

Not like the *in vitro* analyses described above, essentiality of the tRNA intron for viability and tRNA function has been examined only in a limited number of tRNA species *in vivo*. Requirement of the tRNA intron was first examined *in vivo* in tRNA<sup>Ser</sup><sub>CGA</sub> of *S. cerevisiae*, which is encoded by a single gene, and revealed that the intron is dispensable for yeast viability (21). Similarly, the tRNA<sup>Trp</sup> intron nesting the box C/D small RNA could be removed from its gene without affecting the growth of *H. volcanii*, and again the tRNA is encoded by the single gene (22). Our previous study found that removal of the intron from *S. cerevisiae* tRNA<sup>Trp</sup>, which is encoded by six genes with the same sequence including the intron part, has no significant growth and protein synthesis defects (23). However, because only a few tRNA species have been analyzed to date, a tRNA species that harbors an intron essential for growth of the organism may indeed exist.

In this report, to extend our analyses of the physiological roles of the tRNA introns, we used the sequential deletion technique to remove the introns from all the synonymous genes encoding one of the 10 intron-containing tRNA species. Using this method, we obtained a complete set of the total 10 mutants of *S. cerevisiae*, each harboring deletions of all the introns of a single tRNA species, and examined the impact of intron removal on tRNA production and their functions on protein synthesis. Among the 10 intronless mutants, the tRNA<sup>Phe</sup> and tRNA<sup>Tyr</sup> intronless mutants showed impaired cell growth especially at low temperatures, and tRNA<sup>Ile</sup><sub>UAU</sub>, tRNA<sup>Lys</sup><sub>UUU</sub>, tRNA<sup>Phe</sup> and tRNA<sup>Tyr</sup> mutants exhibited various extent of growth defects on non-fermentable carbon sources. None of the 10 intronless mutants showed strong translation defects on ribosome profiles. The intronless mutants of tRNA<sup>Leu</sup><sub>CAA</sub> and tRNA<sup>Phe</sup> had lower amounts of 5.8S rRNA than the wild-type strain, and the former showed an abnormal nucleolar morphology. We also confirmed *in vivo* requirement of the tRNA intron for pseudouridylation of positions 34 and 36 of tRNA<sup>Ile</sup><sub>UAU</sub>, and unexpectedly found that the intron protects tRNA<sup>Ile</sup><sub>UAU</sub> against an aberrant modification. Overall, our results show that all the tRNA introns in *S. cerevisiae* are dispensable for yeast growth while the existence of a canonical intron in certain tRNA genes and/or precursors has impacts on various physiological aspects to maximize yeast viability.

## MATERIALS AND METHODS

### Constructions of intronless tRNA plasmids

We analyzed the tRNA genes on the *S. cerevisiae* genome annotated in Saccharomyces Genome Database (<https://www.yeastgenome.org/>) and Genomic tRNA Database (<http://lowelab.ucsc.edu/GtRNAdb/>). Intronless tRNA plasmids for gene integration were constructed essentially as described by Mori *et al.* (23) and are summarized in Supplementary Table S1A. Briefly, a DNA fragment comprising an intronless tRNA gene and its flanking fragments were amplified by megaprimer polymerase chain reaction (PCR) and normal PCR, respectively, with appropriate primer sets listed in Supplementary Table S2. Then, the two fragments were sequentially introduced into a vector, pTYE374, using restriction sites fused to the ends of the PCR products. To introduce a dual marker cassette into the resulting plasmid, a unique restriction site between the two PCR fragments on the pTYE374 derivative was digested, blunted by T4 DNA polymerase and ligated with an appropriate DNA fragment with one of the dual marker cassettes (i.e. *hisG::ADE2::GAL1p-GIN11M86::cam<sup>r</sup>::hisG*), which was released from the host plasmids by NotI digestion and blunted by T4 DNA polymerase. Three different markers, *LEU2*, *URA3* and *ADE2* from pTYE378, pTYE379 and pTYE380, respectively, were available (Supplementary Table S1B) (23).

### Iterative introduction of multiple intronless mutations into the yeast genome

Intronless strains were mainly constructed from the parental strain BY418 [*MAT $\alpha$*  *ade2 $\Delta$ ::hisG his3 $\Delta$ 200*

*leu2Δ1 lys2Δ202 met15Δ0 trp1Δ63 ura3-52*] (24). On the other hand, we used W303-1A for intron removal from the genes encoding tRNA<sup>Leu</sup><sub>UAG</sub> because BY418 lacks *tL(UAG)L2*, one of the three synonymous tRNA<sup>Leu</sup><sub>UAG</sub> genes, due to accidental deletion during introduction of *met15Δ* mutation. Of note, BY418 was also found to lack *tL(CAA)C*, one of the 10 genes encoding tRNA<sup>Leu</sup><sub>CAA</sub>, near the *LEU2* locus. To integrate an intronless tRNA gene into the yeast chromosome, a plasmid with the intronless gene and a dual marker cassette was first digested with appropriate restriction enzymes to release the entire insert of the plasmid from its vector part. The resulting linear DNA fragments were introduced into yeast cells according to Gietz *et al.* (25), and then transformants were selected on an appropriate selection medium corresponding to the introduced auxotrophic marker. Replacement of the corresponding chromosomal tRNA gene with the intronless tRNA allele was confirmed by genomic PCR with an appropriate set of primers shown in Supplementary Table S3 followed by AGE with a 2.5% (w/v) agarose gel.

The dual marker cassette has a toxic *GIN11M86* gene placed under the control of the *GALI* promoter (26). Because this gene and the auxotrophic marker are sandwiched by two *hisG* sequences, yeast clones that lost the marker cassette via homologous recombination between the *hisG* sequences were selected as galactose resistant clones on the galactose medium. Subsequently, another locus of the same tRNA species was converted into the intronless allele again as described as above. If necessary, the corresponding wild-type tRNA gene on a multicopy vector with a *URA3* marker was introduced into the intermediate constructs, and then iterative replacement of chromosomal copies of the tRNA genes in question was continued until all the chromosomal copies became intronless. Finally, the *URA3* plasmid was cured by plating the strain on the 5'-fluoroorotic acid (5'-FOA) medium.

To reintroduce mitochondrial DNA into TYSC1974, the original tRNA<sup>Leu</sup><sub>CAA</sub> intronless isolate, we performed cytoduction between TYSC1974 and TYSC774 (27). The resulting strains are summarized in Supplementary Table S5.

### RNA preparation and northern blotting

Small RNAs were prepared either by the guanidine thiocyanate/phenol method or by the Na-acetate/phenol method. For the guanidine thiocyanate/phenol method (28), crude RNAs were extracted with a 1:1 mixture of GTE Buffer [0.10 M Tris-HCl, pH 7.6, 4.0 M guanidine thiocyanate and 10 mM ethylenediaminetetraacetic acid (EDTA)] and water-saturated phenol from mid log-phase yeast cells at 65°C, and the water phase was separated by the addition of chloroform and subsequent centrifugation. After phenol chloroform extraction of the aqueous phase followed by chloroform extraction, RNAs were precipitated with 2-propanol, and the final pellets were dissolved in TE [10 mM Tris-HCl, pH 7.5 and 1.0 mM EDTA]. The crude small RNA fractions were separated on an 8% (w/v) or a 10% (w/v) TBE-urea polyacrylamide gel. For the analysis of tRNA aminoacylation, crude RNAs were prepared by the Na-acetate/phenol method, and the resulting RNA fractions were analyzed with an acid-urea gel as described

previously (29). As a deacylation control, a portion of the RNA sample was treated with 50 mM Tris-HCl, pH 9.0 at 37°C for 1 h. The crude RNA fractions were separated on an 8% (w/v) or a 10% (w/v) acid-urea gel at 4°C. RNAs in the TBE-urea and acid-urea gels were transferred onto the Hybond-N<sup>+</sup> charged nylon membrane (GE Healthcare, Chicago, Illinois, USA) using 50 mM Na-acetate, pH 5.5 as a transfer buffer. For analysis of rRNA intermediates, total RNAs were prepared with the Na-acetate/sodium dodecyl sulphate (SDS) buffer [50 mM Na-acetate, pH 5.2, 10 mM EDTA and 1.0% (w/v) SDS] and acidic phenol chloroform [phenol:chloroform = 5:1, pH 4.5] instead of GTE to recover longer RNA molecules. The RNAs were separated on a 1.2% (w/v) agarose gel with 2.2 M formaldehyde in the MOPS buffer, and then transferred onto Hybond-N<sup>+</sup> membranes by capillary transfer in 20 × SSC. Hybridization with digoxigenin (DIG)-labeled probes was carried out in Hybridization Solution [0.50 M Na<sub>2</sub>HPO<sub>4</sub>, 0.34% (v/v) H<sub>3</sub>PO<sub>4</sub>, 7.0% (w/v) SDS, 1.0 mM EDTA, pH 7.0] or DIG Easy Hyb (Roche Diagnostics, Basel, Switzerland) at 42°C or at 37°C. The probes whose sequences are summarized in Supplementary Table S4 were labeled with DIG Oligonucleotide Tailing Kit (Roche).

### Immunofluorescence microscopy

Logarithmically growing cells were fixed in 3.7% (w/v) formaldehyde for 1 h at 30°C. The cells were pelleted by centrifugation at 1600 × *g* for 3 min, washed in SHA Buffer [0.90 M sorbitol, 0.10 M K-Pi, pH 6.5 and 5.0 mM NaN<sub>3</sub>] and then recovered by the same centrifugation step. The cells were resuspended in SHA Buffer to a final concentration of 2.5 OD<sub>600</sub>, and their cell walls were digested with Zymolyase 100T (Nacalai Tesque, Kyoto, Japan). The resulting spheroplasts were gently washed with SHA Buffer, and placed onto poly-L-lysine-coated multi-well slides. The spheroplasts were permeabilized with 0.10% (w/v) Triton X-100, and blocked for 10 min in phosphate-buffered saline (PBS) with 1.0% (w/v) bovine serum albumin (BSA) in a humid chamber, and then incubated with an anti-Nop1p mouse monoclonal antibody 28F2 (GeneTex, Inc., Irvine, California, USA) for 1 h at room temperature. After a number of washes with PBS containing 0.10% (w/v) BSA, the spheroplasts were incubated with anti-mouse IgG antibodies labeled with Alexa 594 (Thermo Fisher Scientific, Waltham, Massachusetts, USA) for 1 h in the dark. The spheroplasts were washed with PBS containing 0.10% (w/v) BSA, and mounted in Mounting Solution [90% (v/v) glycerol and 0.10% (w/v) *p*-phenylenediamine] after staining with 4',6-diamidino-2-phenylindole (DAPI). Images were obtained using an Olympus BX60 fluorescence microscope (Olympus Corp., Tokyo, Japan) with a CSU-10 confocal unit (Yokogawa Electric, Musashino, Japan). Three-dimensional images were constructed from *z*-stacks of confocal images by MetaMorph software (Molecular Devices, San Jose, California, USA).

### Purification and mass spectrometric analysis of tRNAs

tRNA<sup>Ile</sup><sub>UAU</sub> was purified from the wild-type, intronless and *pus1Δ* strains by the chaplet column chromatogra-

phy method (30). Briefly, a small RNA fraction was prepared from the above yeast cells cultured in YPD until the mid-log phase by the guanidine thiocyanate/phenol method described previously. The small RNA fraction was heat-denatured at 65°C, and hybridized with a biotinylated anti-tRNA<sup>Ile</sup><sub>UAU</sub> oligonucleotide (biotin-5'-CCACGACG GTCGCGTTATAAGCACGAAGCT-3') that was immobilized on a HiTrap Streptavidin HP pre-packed column (1 ml bed volume, GE Healthcare) in Binding Buffer [30 mM HEPES-KOH, pH 7.5, 15 mM EDTA and 1.2 M NaCl] through gradual cooling from 65°C to the room temperature under continuous circulation of the applied RNA sample. After washing the column with Washing Buffer [2.5 mM HEPES-KOH, pH 7.5, 1.25 mM EDTA and 0.10 M NaCl], the tRNA was eluted with TE at 65°C. The eluate was ethanol-precipitated, further purified by preparative TBE-urea PAGE and finally dissolved in RNase-free water.

Details of tRNA analysis by mass spectrometry (MS) were described in (31,32). To analyze pseudouridylation, an aliquot of the purified tRNA<sup>Ile</sup><sub>UAU</sub> was subjected to cyanoethylation of Ψ residues with acrylonitrile, as described by Megen-Jørgensen and Kirpekar (33). Subsequently, 250 femtomoles of the cyanoethylated and control tRNA<sup>Ile</sup><sub>UAU</sub> were digested with RNase T1 (Epicentre, Madison, Wisconsin, USA), and analyzed with a system consisting of a capillary liquid chromatography (LC) (DiNa, KYA Technologies, Tokyo, Japan) and a nano-electrospray ionization (ESI)-mass spectrometer (LTQ Orbitrap XL, Thermo Fisher Scientific). The digested tRNA fragments were desalted on a trapping column (0.5 × 1 mm, KYA Technologies) and separated with a C18 capillary column (HiQ Sil C18; 3 μm, 100 Å pore size; 0.15 × 50 mm, KYA Technologies, Tokyo, Japan), and the eluate was sprayed from an energized nanosprayer tip into the mass spectrometer. Ions were scanned with a negative polarity mode over an *m/z* range of 600 to 2000 throughout the separation. To identify ncm<sup>5</sup>U in tRNA<sup>Ile</sup><sub>UAU</sub>Δint, enzymatically digested nucleosides were analyzed by a micro-flow LC/MS system consisting of a Q Exactive (Thermo Fisher Scientific) with an ESI source and an Ultimate 3000 LC system (Dionex/Thermo Fisher Scientific) through a hydrophilic interaction LC (HILIC) column (SeQuant ZIC-cHILIC, 3 μm, 2.1 × 150 mm, Merck Millipore, Burlington, Massachusetts, USA) with a guard column (SeQuant ZIC-cHILIC guard kit, 3 μm, 2.1 × 20 mm, Merck Millipore) as described previously (34). Deprotonated nucleoside ions were monitored with a negative polarity mode over an *m/z* range of 110–700 throughout the separation.

### In vivo mis-decoding assay

To evaluate misdecoding of an AUG codon to Ile, a *c-myc* tag sequence with an AUA codon as its critical 5th Ile residue and its derivative containing AUG instead of AUA were introduced at the terminus of the EGFP ORF (see Figure 5F). A set of two 38 nt oligoDNAs (see Supplementary Table S4) were annealed to form ds oligoDNA encoding the c-Myc tag. Another ds oligoDNA encoding the mutant (c-Myc Ile5Met; Supplementary Table S4) was also prepared similarly. These two oligoDNAs were inserted into the BglII/EcoRI site of the plasmid pTYSC425, which

harbors an EGFP gene under the control of the *ADHI* promoter, to yield pSM002 and pSM004, respectively (Supplementary Table S1B). The plasmids were introduced into appropriate strains, their yeast lysates for western blotting were prepared by alkaline lysis (35), and subjected to western blotting with the anti-c-Myc antibody, 9E10 (Wako Pure Chemicals, Osaka, Japan). For signal detection, Cy3-conjugated anti-mouse IgG antibodies and Cy5-conjugated anti-rabbit IgG antibodies (Molecular Probes, Eugene, Oregon, USA) were used as the secondary antibodies, and fluorescence signals were read with Typhoon FLA-7000 Fluorescence Scanner (GE Healthcare).

## RESULTS

### All of the tRNA species encoded by intron-containing genes can be expressed from the intronless allele in *S. cerevisiae*

We previously demonstrated that the intron in tRNA<sup>Trp</sup> genes is dispensable for yeast growth (23), following the report that the intron of tRNA<sup>Ser</sup><sub>CGA</sub> is dispensable (21). Then, we extended our analysis to the other tRNA species on the yeast genome. As summarized in Table 1, 10 tRNA species are encoded by intron-containing genes with various gene numbers. Iterative gene replacement with cassettes consisting of positive and negative selection markers (23,26) was used to generate yeast strains in which all of the genes encoding a single tRNA species were converted into intronless alleles. Proper replacement of the chromosomal genes with intronless versions was confirmed by genomic PCR (Supplementary Figure S1A and B). During the iterative gene replacement, a wild-type gene of the same tRNA species was maintained on a *URA3* plasmid to compensate possible deleterious effects of intron removal. As described in 'Material and Methods' section, most of intronless strains were constructed from BY418 as the wild-type strain with the exception that the intronless strain of tRNA<sup>Leu</sup><sub>UAG</sub> was constructed from W303-1A, because one of the three tRNA<sup>Leu</sup><sub>UAG</sub> genes, *tL(UAG)L2*, was accidentally deleted on introduction of an auxotrophic marker next to the tRNA gene during the construction of BY418. The genome of *S. cerevisiae* has two un-annotated possible intron-containing tRNA genes with high homology to tRNA<sup>Ser</sup><sub>GCU</sub> genes, *tX(XXX)D* and *tX(XXX)L*, which have only one nucleotide deletion in the mature tRNA<sup>Ser</sup><sub>GCU</sub> sequence. Thus, we also removed the introns from these two genes, and used the resulting quadruple mutant that lost all the introns from *tS(GCU)F*, *tS(GCU)O*, *tX(XXX)D* and *tX(XXX)L* loci as the tRNA<sup>Ser</sup><sub>GCU</sub> intronless strain.

We could construct intronless strains of all the 10 tRNA species, and it was found that they could lose the *URA3* plasmids with the corresponding wild-type genes. Figure 1 shows growth of the intronless strains without any additional copy of corresponding wild-type genes under various growth conditions. When growth of the intronless strains were compared with corresponding wild-type strains on YPD (rich glucose medium), the tRNA<sup>Ser</sup><sub>GCU</sub>, tRNA<sup>Ile</sup><sub>UAU</sub>, tRNA<sup>Leu</sup><sub>UAG</sub>, tRNA<sup>Lys</sup><sub>UUU</sub> and tRNA<sup>Pro</sup><sub>UGG</sub> intronless strains grew similarly to the corresponding wild-type strains (Figure 1A), as well as the tRNA<sup>Ser</sup><sub>CGA</sub> and tRNA<sup>Trp</sup> intronless strains, whose normal growth phenotypes were re-

**Table 1.** Summary of the growth phenotypes of all the intronless mutants on agar media

| C source                | Glucose |     |     |        |     | Glycerol |     | Galactose |     | Ethanol |      |
|-------------------------|---------|-----|-----|--------|-----|----------|-----|-----------|-----|---------|------|
|                         | 17      | 23  | 30  | 33     | 37  | 23       | 30  | 23        | 30  | 23      | 30   |
| Temperature (°C)        |         |     |     |        |     |          |     |           |     |         |      |
| W303-1A                 | +++     | +++ | +++ | +++    | +++ | +++      | +++ | +++       | +++ | +++     | +++  |
| Leu <sub>UAG</sub> Δint | +++     | +++ | +++ | +++    | +++ | +++      | +++ | +++       | +++ | +++     | +++  |
| BY418                   | +++     | +++ | +++ | +++    | +++ | +++      | +++ | +++       | +++ | +++     | +++  |
| Ser <sub>CGA</sub> Δint | +++     | +++ | +++ | +++    | +++ | +++      | +++ | +++       | +++ | +++     | +++  |
| Ile <sub>UAU</sub> Δint | +++     | +++ | +++ | +++    | +++ | +++      | +++ | +++       | +++ | +++     | +++  |
| Ser <sub>GCU</sub> Δint | +++     | +++ | +++ | +++    | +++ | +++      | +++ | +++       | +++ | +++     | +++  |
| Trp <sub>CCA</sub> Δint | +++     | +++ | +++ | +++    | +++ | +++      | +++ | +++       | +++ | +++     | +++  |
| Lys <sub>UUU</sub> Δint | +++     | +++ | +++ | +++    | +++ | +++      | +++ | +++       | +++ | +++     | +++  |
| Tyr <sub>GUA</sub> Δint | +       | ++  | ++  | ++/+++ | +++ | -        | ++  | ++        | +++ | +/-     | ++/+ |
| Leu <sub>CAA</sub> Δint | ++      | +++ | +++ | +++    | +++ | +++      | +++ | +++       | +++ | +++     | +++  |
| Pro <sub>UGG</sub> Δint | +++     | +++ | +++ | +++    | +++ | +++      | +++ | +++       | +++ | +++     | +++  |
| Phe <sub>GAA</sub> Δint | +       | ++  | ++  | +++    | +++ | -        | -   | ++        | +++ | -       | -    |

+++ indicates growth similar to that of the corresponding wild-type strain (W303-1A or BY418). ++ and + indicate slight and mild growth defects, respectively. - indicates a severe growth retardation or lethality under these conditions. The tRNA<sup>Leu</sup><sub>CAA</sub>Δint strain analyzed here was the ρ<sup>+</sup> strain (see the main text).

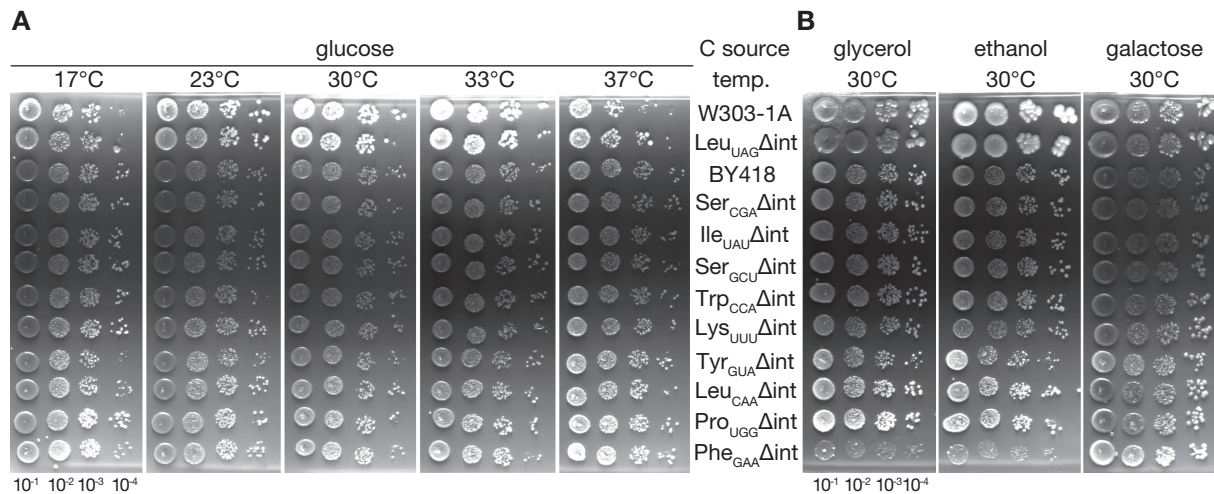

**Figure 1.** Growth of the tRNA-intronless strains. (A) Growth of yeast strains in which all the tRNA genes encoding a certain tRNA species (shown on the right) were converted into an intronless allele was compared at various temperatures. Saturated cultures were serially diluted 10-fold as shown in the bottom, and 4 μl aliquots of each diluent were spotted onto YPD plates. The plates were incubated at the indicated temperatures. As described in the text, two wild-type strains were grown as controls: W303-1A as the parental strain of the tRNA<sup>Leu</sup><sub>UAG</sub> intronless strain and BY418 as the parental strain of the other intronless strains. Growth of TYSC2148 (ρ<sup>+</sup> strain) is shown for the tRNA<sup>Leu</sup><sub>CAA</sub> intronless strain. (B) Growth of the tRNA intronless strains on different carbon sources. Serially diluted cultures of the two wild-type and 10 intronless strains were spotted onto YPGly (glycerol), YPEt (ethanol) and YPGal (galactose) plates as described in (A). The plates were incubated at 30°C.

ported previously (21,23). On the other hand, the intronless strains of tRNA<sup>Tyr</sup> and tRNA<sup>Phe</sup> showed marginal growth defects especially at low temperatures (Figure 1A). The tRNA<sup>Leu</sup><sub>CAA</sub> intronless strain also showed slight growth retardation at 17°C (Figure 1A). Next, we examined the growth of the intronless strains on different carbon sources. As shown in Figure 1B, the tRNA<sup>Ser</sup><sub>GCU</sub>, tRNA<sup>Leu</sup><sub>UAG</sub>, tRNA<sup>Leu</sup><sub>CAA</sub>, tRNA<sup>Pro</sup><sub>UGG</sub>, tRNA<sup>Ser</sup><sub>CGA</sub> and tRNA<sup>Trp</sup> intronless mutants did not show any growth defects on media with glycerol, ethanol or galactose, whereas the tRNA<sup>Ile</sup><sub>UAU</sub> and tRNA<sup>Lys</sup><sub>UUU</sub> intronless strains grew slightly slowly on the glycerol and ethanol media at 30°C. The tRNA<sup>Tyr</sup> mutant, which exhibited a growth defect at the low temperatures on the glucose medium also displayed slow-growth phenotypes on the medium with glycerol, ethanol or galactose. Notably, the tRNA<sup>Phe</sup> intronless strain barely grew on

the non-fermentable carbon sources, glycerol and ethanol. These growth phenotypes of the intronless strains are summarized in Table 1.

We also analyzed growth of the tRNA<sup>Phe</sup>, tRNA<sup>Tyr</sup>, tRNA<sup>Ile</sup><sub>UAU</sub> and tRNA<sup>Lys</sup><sub>UUU</sub> intronless strains more in detail in liquid media. The doubling times ( $t_D$ ) of these mutants grown in liquid YPD were not significantly different from those of the wild-type either at 30°C or at 23°C (Figure 2A). On the other hand, apparent slow growth and cold-sensitive phenotypes were seen for the tRNA<sup>Tyr</sup> intronless and tRNA<sup>Ile</sup><sub>UAU</sub> intronless mutants grown in YPGly (the tRNA<sup>Tyr</sup> intronless strain,  $t_D = 9.3 \pm 0.3$  h at 30°C and  $25.0 \pm 3.9$  h at 23°C; the tRNA<sup>Ile</sup><sub>UAU</sub> intronless strain,  $t_D = 7.1 \pm 0.1$  h at 30°C and  $20.2 \pm 1.0$  h at 23°C; BY418,  $t_D = 6.3 \pm 0.5$  h at 30°C and  $17.9 \pm 1.4$  h at 23°C) (Figure 2B). The tRNA<sup>Phe</sup> intronless and tRNA<sup>Lys</sup><sub>UUU</sub> intron-

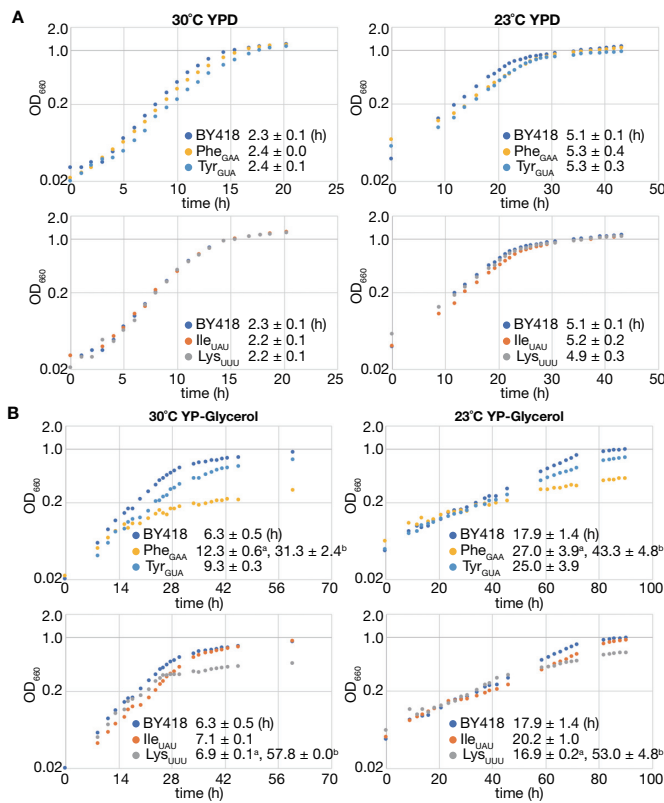

**Figure 2.** Growth curve of the tRNA<sup>Phe</sup>, tRNA<sup>Tyr</sup>, tRNA<sup>Ile<sub>UAU</sub></sup> and tRNA<sup>Lys<sub>UUU</sub></sup> intronless mutants in liquid YPD or YPGly. (A) Saturated yeast cultures of the wild-type strain (BY418) and the four intronless strains of tRNA<sup>Phe</sup>, tRNA<sup>Tyr</sup>, tRNA<sup>Ile<sub>UAU</sub></sup> and tRNA<sup>Lys<sub>UUU</sub></sup> were inoculated into the liquid YPD medium and grown at 30°C (left) or 23°C (right). The OD<sub>660</sub> traces of the wild-type, tRNA<sup>Phe</sup> intronless and tRNA<sup>Tyr</sup> intronless strains were shown in the upper panels. Those of the wild-type, tRNA<sup>Ile<sub>UAU</sub></sup> intronless and tRNA<sup>Lys<sub>UUU</sub></sup> intronless strains were in the lower panels. A color code and the doubling time under the log phase growth of each strain are indicated in the graph. (B) Similar experiments as those described in (A) were performed using the non-fermentable liquid medium, YPGly, instead of YPD. When the tRNA<sup>Phe</sup> intronless and tRNA<sup>Lys<sub>UUU</sub></sup> intronless strains were cultured in YPGly, they showed biphasic growth defects so that their doubling time in each growth phase is indicated (a, Early phase; b, Late phase).

less mutants exhibited more interesting phenotypes, biphasic growth defects in which growth retardation was exaggerated at a certain timepoint of their growth. Therefore, we calculated two doubling times (early phase and late phase) for these strains. The doubling times of the tRNA<sup>Phe</sup> intronless strain during the early growth phase in YPGly were longer than those of the wild-type strain (Figure 2B;  $12.3 \pm 0.6$  h versus  $6.3 \pm 0.5$  h at 30°C, and  $27.0 \pm 3.9$  h versus  $17.9 \pm 1.4$  h at 23°C, respectively). This slow growth phenotype of the tRNA<sup>Phe</sup> intronless strain became exacerbated at the later timepoint ( $31.3 \pm 2.4$  h at 30°C and  $43.3 \pm 4.8$  h at 23°C). In the case of the tRNA<sup>Lys<sub>UUU</sub></sup> intronless mutant, it grew rather normally until a certain point (early phase  $t_D = 6.9 \pm 0.1$  h at 30°C and  $16.9 \pm 0.2$  h at 23°C), but its growth slowed down severely thereafter (late phase  $t_D = 57.8 \pm 0.0$  h at 30°C and  $53.0 \pm 4.8$  h at 23°C).

Together with previous results, our results clearly reveal that none of the tRNA introns on the *S. cerevisiae* genome

are essential for the yeast growth on fermentable carbon sources under laboratory conditions. However, the introns in specific tRNA genes, especially those of tRNA<sup>Phe</sup>, have crucial for survival and proper growth for yeast cells on non-fermentable carbon sources. Our original isolates of the tRNA<sup>Leu<sub>CAA</sub></sup> intronless strain grew poorly at all the temperatures we tested, but were found to be  $\rho^-$ , where the yeast strain exhibits a growth defect in non-fermentable media but not lethal in fermentable media because of its loss of mitochondrial DNA (data not shown). Subsequently, we tested whether or not re-introduction of mitochondrial DNA into this strain via cytoduction could complement the growth defect. Indeed, the tRNA<sup>Leu<sub>CAA</sub></sup> intronless yeast supplied with mitochondrial DNA grew normally both in fermentable and non-fermentable media, while the strain showed the slight but reproducible growth defect at 17°C, as mentioned above. We used this  $\rho^+$  derivative, TYSC2148, in the following analyses.

### Intron removal has minor effects on tRNA production

Next, we investigated expression of each tRNA species in the wild-type and intronless strains by northern blotting. Low-molecular weight RNA fractions were prepared from each strain using the guanidine thiocyanate/phenol extraction method to measure overall tRNA amounts. Figure 3 summarizes quantitative northern blotting after TBE-based urea-PAGE of RNA samples from the wild-type and intronless strains. The expression level of tRNA<sup>Asp<sub>GUC</sub></sup> was used as an internal control. As expected from the intron removal of all the tRNA<sup>Trp</sup> genes, removal of the introns did not affect total amounts of tRNA<sup>Ser<sub>CGA</sub></sup>, tRNA<sup>Ile<sub>UAU</sub></sup>, tRNA<sup>Ser<sub>GCU</sub></sup>, tRNA<sup>Leu<sub>UAG</sub></sup>, tRNA<sup>Lys<sub>UUU</sub></sup> or tRNA<sup>Phe</sup>. By contrast, tRNA<sup>Tyr</sup>, tRNA<sup>Leu<sub>CAA</sub></sup> and tRNA<sup>Pro<sub>UGG</sub></sup> in the corresponding intronless strains were expressed  $67 \pm 3\%$ ,  $75 \pm 3\%$  and  $73 \pm 10\%$  of those in the wild-type strain, respectively (Figure 3). Although the changes were not remarkable, the reductions in the levels of these tRNAs were reproducible (Student's *t*-tests:  $P = 0.0011$ ,  $0.0001$  and  $0.0427$ , respectively). These results suggest that the introns of some yeast tRNA genes are required to maintain proper levels of the corresponding tRNAs *in vivo*. It should be noted that the tRNA<sup>Tyr</sup> intronless strain displayed growth defects (Figure 1) in addition to reduced tRNA<sup>Tyr</sup> levels, suggesting that the growth defects may come from this much of tRNA<sup>Tyr</sup> shortage.

Then, we examined aminoacylation efficiency of tRNAs in the intronless mutants. With the exception of tRNA<sup>Ser<sub>GCU</sub></sup>, aminoacylation statuses of tRNAs derived from the intronless tRNA genes were quite similar to those from the wild-type genes in the acidic urea-PAGE (Supplementary Figure S2), implying that aminoacylation is unaffected by the presence or absence of the tRNA introns in tRNA precursors. In the case of the tRNA<sup>Ser<sub>GCU</sub></sup> intronless mutant, a new molecular species migrating faster than the wild-type tRNA<sup>Ser<sub>GCU</sub></sup> was detected in the acidic urea-PAGE (Supplementary Figure S2, band indicated by '\*') while no such a fast-migrating molecular species was detected in TBE-based urea-PAGE (Figure 3). The position of the fast-migrating band was shifted upon alkaline treatment (Supplementary Figure S2, band indicated with '\*\*'),

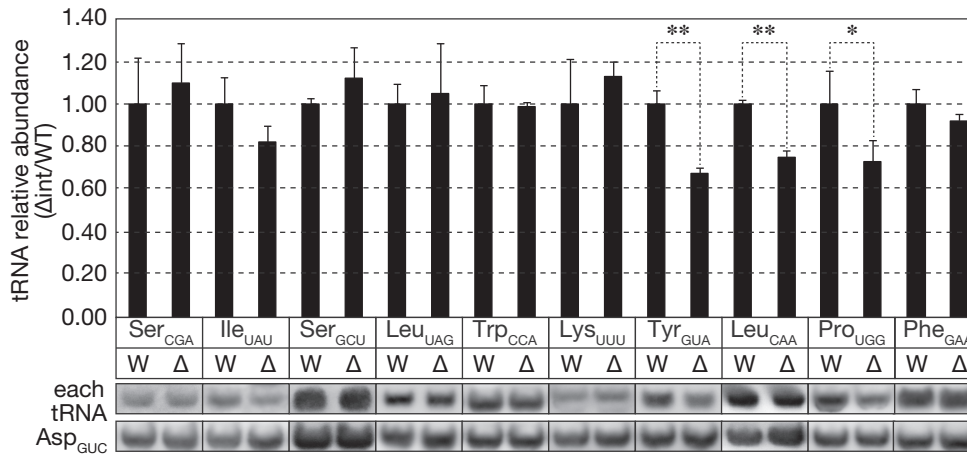

**Figure 3.** Intron removal from some isoacceptor tRNAs has weak effects on expression of the corresponding tRNAs. Northern blotting of tRNA levels in the wild-type (W) and intronless ( $\Delta$ ) strains. Small RNA fractions (2.0  $\mu$ g each) were analyzed by TBE-based urea-PAGE/northern blotting for each tRNA isotype. The expression level of a major tRNA, tRNA<sup>Asp</sup>, was used as an internal control. The upper bar graph shows quantification of the northern blotting data. The amount of a tRNA species shown in the graph bottom was first normalized by that of tRNA<sup>Asp</sup>, and is expressed as relative abundance where the normalized amount of each tRNA in the wild-type strain is set to 1. Data represent the mean plus standard deviation (error bar) of at least three biological replicates. The lower images show a set of typical northern blotting images of the RNA in question (upper) and the control tRNA<sup>Asp</sup> (lower); \*,  $P < 0.05$  and \*\*,  $P < 0.001$  by Student's  $t$ -tests.

suggesting that the fast-migrating tRNA species seems to be almost completely aminoacylated. This fast-migrating band was only detected in the quadruple intronless mutant [*ts(gcu)f $\Delta$ int ts(gcu)o $\Delta$ int tx(xxx)d $\Delta$ int tx(xxx)l $\Delta$ int*] but not in the triple intronless mutant [*ts(gcu)f $\Delta$ int ts(gcu)o $\Delta$ int tx(xxx)l $\Delta$ int tX(XXX)D*] (data not shown).

#### Alteration in 5.8S rRNA production and nucleolar morphology in the tRNA<sup>Leu<sub>CAA</sub></sup> intronless mutant

During the analysis of tRNA amounts in the intronless strains, we noticed that the intronless mutants of tRNA<sup>Leu<sub>CAA</sub></sup> and tRNA<sup>Phe</sup> exhibited lower amounts of 5.8S rRNA than the wild-type strain. Indeed, quantitative northern blotting showed that the amounts of 5.8S rRNA in the tRNA<sup>Leu<sub>CAA</sub></sup> and tRNA<sup>Phe</sup> intronless mutants decrease to  $70 \pm 3\%$  and  $79 \pm 10\%$  of that of the wild-type strain, respectively (Figure 4A; Student's  $t$ -tests,  $P = 0.0058$  and  $0.0193$ , respectively). Because rRNAs constitute a large portion of the total RNA fraction, a small reduction in the rRNA level would result in relative increases in the levels of the other RNA species. This effect explained the slight increase in the amount of the control tRNA<sup>Asp</sup> in the tRNA<sup>Leu<sub>CAA</sub></sup> and tRNA<sup>Phe</sup> intronless strains (Figure 4A). The 5.8S rRNA levels in the other mutants were not significantly different from those in the wild-type strains (Figure 4A).

Next, we examined the effects of removal of the introns from the tRNA<sup>Leu<sub>CAA</sub></sup> and tRNA<sup>Phe</sup> genes on other aspects of rRNA production. tRNA genes tend to gather around the nucleolus (36), and such nuclear/nucleolar organization may be affected by removal of the introns from tRNA genes. This may have some effects on rRNA synthesis and/or processing. First, we analyzed rRNA processing in the tRNA<sup>Leu<sub>CAA</sub></sup> intronless and tRNA<sup>Phe</sup> intronless mutants by northern blotting with intermediate-specific probes; 'probe a' hybridized with a region between the A<sub>2</sub> and A<sub>3</sub> pro-

cessing sites in *ITS1* of the 35S rRNA primary transcript, and 'probe b' hybridized with a region between the E and C<sub>2</sub> sites in *ITS2* (Figure 4B, upper panel). In northern hybridization with probe a, no accumulation of the 27SA<sub>2</sub> rRNA intermediate was observed in the tRNA<sup>Leu<sub>CAA</sub></sup> intronless mutant, while significant signal accumulation of 27SA<sub>2</sub> was observed in the tRNA<sup>Phe</sup> mutant (Figure 4B, second panel; assignment of intermediates was according to (37)). The total amount of  $\sim 27S$  rRNA intermediates recognized by probe b increased slightly both in the mutants (Figure 4B, fourth panel). These results suggest that some nucleolar RNA processing events might be retarded in these mutants, and that the processing steps affected by the mutants are somehow different between the two. Next, we assessed the nucleolar morphology in all 10 tRNA intronless mutants by immunofluorescence using Nop1p as the nucleolar marker. Three-dimensional images were acquired via  $z$ -stack scanning of nucleoli (Figure 4C; upper panels), and were merged with a DAPI-staining image (Figure 4C; lower panels) to reveal the nucleolar structure and positioning. As seen in the wild-type strains (W303-1A and BY418), the cup-shaped nucleolus (green) usually closely attaches with the nucleoplasm containing chromosomes (red), and forms a part of the round or oval nuclear shape. Nine of the tRNA mutants, including tRNA<sup>Phe</sup>, displayed a normal nucleolus tightly adjoined their nucleoplasm. On the other hand, some of the tRNA<sup>Leu<sub>CAA</sub></sup> mutant cells had an atypical nucleolus of which part was detached from the nucleoplasm and formed a protrusion into the cytoplasm (Figure 4C and Supplementary Figure S4). Although only a small proportion of the mutant cells harbored this type of the atypical nucleolus, such aberrant nucleoli were seldom observed in the wild-type and the other intronless yeast cells. Indeed,  $7.2 \pm 0.7\%$  of tRNA<sup>Leu<sub>CAA</sub></sup> intronless cells had the aberrant nucleolus while only  $1.3 \pm 1.1\%$  of the wild-type cells have aberrant one (Student's  $t$ -test,  $P = 0.0046$ ). Hence, intron re-

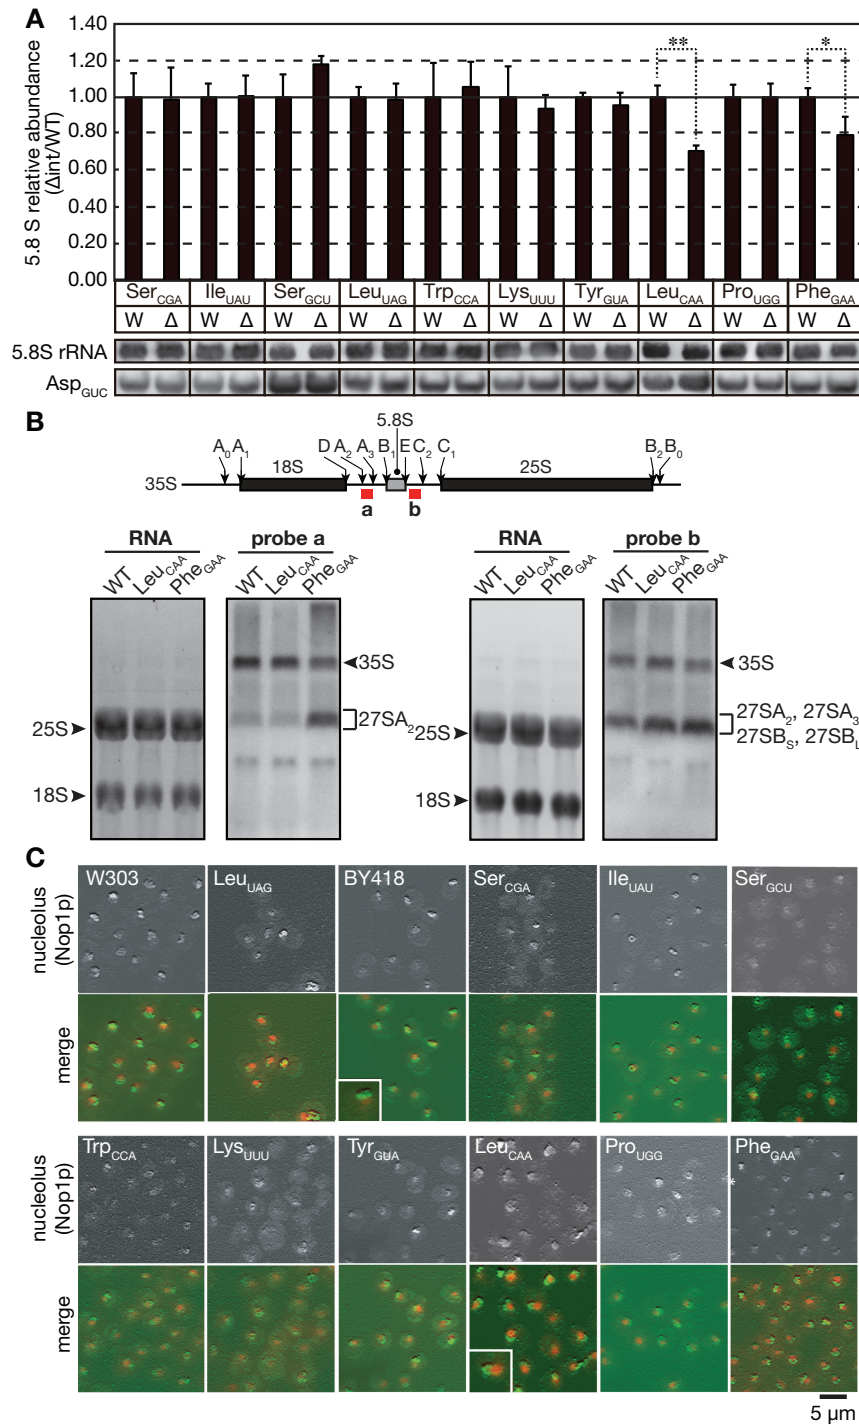

**Figure 4.** Intron removal from tRNA<sup>Leu</sup><sub>CAA</sub> genes reduces the 5.8S rRNA amount and alters nucleolar morphology. (A) Northern blotting analyses of 5.8S rRNA levels in the wild-type (W) and intronless (Δ) strains. Small RNA fractions were prepared, analyzed and quantified by northern blotting as described in Figure 3. Data represent the mean plus standard deviation (error bar) of three biological replicates. Because the RNA samples analyzed here were the same as those used in Figure 3, the same northern blotting data for tRNA<sup>Asp</sup> were used as an internal control. See the Figure 3 legend in detail. (B) Upper panel: Schematic illustration of the major processing sites of the 35S rRNA primary transcript. The hybridization regions of the probes are indicated by red boxes. Lower panel: RNAs from the wild-type (WT), tRNA<sup>Leu</sup><sub>CAA</sub> intronless and tRNA<sup>Phe</sup> intronless strains were analyzed by northern hybridization with probes against the A<sub>2</sub>-A<sub>3</sub> region in *ITS1* (probe a, second panel) and the E-C<sub>2</sub> region in *ITS2* (probe b, fourth panel) of the 35S rRNA precursor. Total RNA staining with SYBR Green II of the agarose gels is shown in the first and third panels. Assignment of intermediates was according to (37). (C) Immunofluorescence images of nucleolar morphology in the wild-type strains (W303-1A, BY418) and the indicated intronless strains. Yeast strains grown in YPD at 30°C were fixed and subjected to immunofluorescence with an anti-Nop1p (nucleolar marker) antibody, and DAPI was used to stain the nucleus. The upper panel in each set of images represents a 3D reconstruction image of the Nop1p stain, and the lower panel is the merged image of the Nop1p stain (green) and the DNA stain (red). The small boxed areas are enlarged images of the nucleolus in the wild-type and that of the typical nucleolus with an abnormal shape in the tRNA<sup>Leu</sup><sub>CAA</sub> intronless mutant.



removal from the tRNA genes encoding tRNA<sup>Leu</sup><sub>CAA</sub> affects the nucleolar morphology to some degree, and this might be related to the reduction in the amount of 5.8S rRNA.

To examine the impact of tRNA intron removal from tRNA genes, especially those of tRNA<sup>Leu</sup><sub>CAA</sub> and tRNA<sup>Phe</sup>, on global translation *in vivo*, we analyzed polysome profiles in all 10 tRNA intronless mutants (Supplementary Figure S3). Many of the intronless strains, including tRNA<sup>Leu</sup><sub>CAA</sub> and tRNA<sup>Phe</sup>, had similar polysome/monosome ratios to those of the corresponding parent strains, indicating that intron removal from tRNA genes does not greatly affect global translation, even though some mutants show minor but obvious defects in ribosome biosynthesis.

### The tRNA intron prevents aberrant modification in the anticodon

Post-transcriptional modifications in tRNAs are characteristic structural features of tRNAs. The anticodon of *S. cerevisiae* tRNA<sup>Ile</sup><sub>UAU</sub> contains two pseudouridines ( $\Psi$ ) at positions 34 and 36 (15). These  $\Psi$ s are introduced in the precursor form of tRNA<sup>Ile</sup><sub>UAU</sub> in an intron-dependent manner, because pseudouridylase Pus1p recognizes the anticodon in the double-stranded form containing the intron (16). Because a  $\Psi A \Psi$  anticodon in tRNA<sup>Ile</sup><sub>UAU</sub> is supposed to recognize an AUA codon specifically, the intron-dependent pseudouridylation plays a critical role in accurate decoding during protein synthesis (38).

To analyze the tRNA modification status, we isolated tRNA<sup>Ile</sup><sub>UAU</sub> from the wild-type, intronless and *pus1* $\Delta$  strains by the chaplet column chromatography method (30). Because  $\Psi$  is a mass-silent modification, the isolated tRNA was treated with acrylonitrile to derivatize  $\Psi$ s by cyanoethylation (33), and then digested by RNase T<sub>1</sub>, and subjected to capillary LC-nano-ESI-mass spectrometry (RNA-MS) (31,32). In the wild-type strain, we clearly detected the anticodon-containing fragment (C32–G40) with the increased molecular mass by the addition of one or two cyanoethyl groups (Figure 5A, third and fourth rows), indicating the presence of  $\Psi 34$  and  $\Psi 36$  in this fragment as reported previously (16). In the tRNA<sup>Ile</sup><sub>UAU</sub> intronless strain, a non-cyanoethylated fragment was mainly detected, although a small peak representing the mono-cyanoethylated fragment was also observed (Figure 5A). Because the mono-cyanoethylated fragment was also detected slightly in the same tRNA isolated from the *pus1* $\Delta$  strain, it is likely that unmodified uridines were non-specifically cyanoethylated to some extent. Thus, as expected, these findings indicate that tRNA<sup>Ile</sup><sub>UAU</sub> isolated from the intronless strain contained no  $\Psi$ s in the anticodon. Furthermore, we happened to detect the anticodon-containing fragment of tRNA<sup>Ile</sup><sub>UAU</sub> isolated from the intronless strain with the molecular mass 57 Da larger than that of the wild-type tRNA (Figure 5B and C, third row). This fragment was further probed by collision-induced dissociation (CID), confirming that the increased mass resided at position 34 in the anticodon (Figure 5D). According to its molecular mass, the modification was assumed to be 5-carbamoylmethyluridine (ncm<sup>5</sup>U). To confirm the chemical structure, we conducted an LC/MS nucleoside analy-

sis of tRNA<sup>Ile</sup><sub>UAU</sub> isolated from the intronless strain (Figure 5E). As expected, the modified uridine formed in the tRNA<sup>Ile</sup><sub>UAU</sub> isolated from the intronless strain was coeluted with the ncm<sup>5</sup>U nucleoside in yeast total RNA (Figure 5E, third and second panels, respectively), confirming that ncm<sup>5</sup>U was introduced at position 34 of tRNA<sup>Ile</sup><sub>UAU</sub> isolated from the intronless strain. Curiously, ncm<sup>5</sup>U was also found in the same tRNA isolated from the *pus1* $\Delta$  strain, indicating that Pus1p-mediated  $\Psi A \Psi$  formation prevents ncm<sup>5</sup>U formation. Judging from the peak height ratio of the anticodon-containing fragments (Figure 5C), ~40% of the tRNA<sup>Ile</sup><sub>UAU</sub> population contained the ncm<sup>5</sup>U modification.

Because ncm<sup>5</sup>U has an ability to read G-ending codons *in vivo* (39), we suspected that the tRNA<sup>Ile</sup> with the ncm<sup>5</sup>UAU anticodon tends to misdecode AUG as Ile. To test this possibility, we expressed an EGFP reporter with a c-Myc tag (EQKLISEEDL). The c-Myc tag contains a critical Ile residue to be recognized by the mouse monoclonal antibody, 9E10; hence, we mutated this Ile codon to an AUG codon. If the AUG codon in the c-Myc tag was indeed mistranslated as Ile, the product would be detected by the 9E10 antibody. In the wild-type strain, the EGFP–c-Myc fusion protein was efficiently detected by western blotting with 9E10, whereas the mutant construct was hardly detected (Figure 5F). On the contrary to our expectation, similar results were obtained for the intronless strain. The results indicate that the tRNA<sup>Ile</sup> with the aberrant ncm<sup>5</sup>UAU anticodon barely misdecodes the AUG codon in this reporter.

## DISCUSSION

Most of the eukaryotes whose genomes have been sequenced have at least one isoacceptor/isodecoder tRNA whose genes contain a canonical intron. In an extreme case, all the tRNA species of an organism include at least one isodecoder encoded by intron-containing genes. Such canonical introns exist in all of the synonymous genes encoding a certain isoacceptor/isodecoder tRNA on a genome. These facts predicted that some tRNA introns might be essential for cell viability of the organism. However, we successfully deleted the introns from all the synonymous genes encoding any one of the 10 tRNA species in *S. cerevisiae*, which are the only tRNA species produced from intron-containing genes. These strains were all variable, and most of the mutants grew normally as the wild-type yeasts on the glucose media. Therefore, our results negate the above prediction, at least in *S. cerevisiae*, and are consistent with the recent report that the lethal effects of deleting an essential gene encoding tRNA ligase or 2'-phosphotransferase are bypassed by expressing a set of the 'prespliced' intronless versions of the 10 intron-containing tRNAs in *S. cerevisiae* (40).

On the other hand, the intron removal from some tRNA genes resulted in various phenotypes. Complete removal of the introns from the genes encoding tRNA<sup>Ile</sup><sub>UAU</sub>, tRNA<sup>Lys</sup><sub>UUU</sub>, tRNA<sup>Tyr</sup> and tRNA<sup>Phe</sup> caused unexpected growth defects on respiratory media (Table 1; Figures 1 and 2). In addition, intron removal reduced the amounts of tRNA<sup>Leu</sup><sub>CAA</sub>, tRNA<sup>Tyr</sup> and tRNA<sup>Pro</sup><sub>UGG</sub> in the mutant cells (Figure 3), but did not affect aminoacylation levels

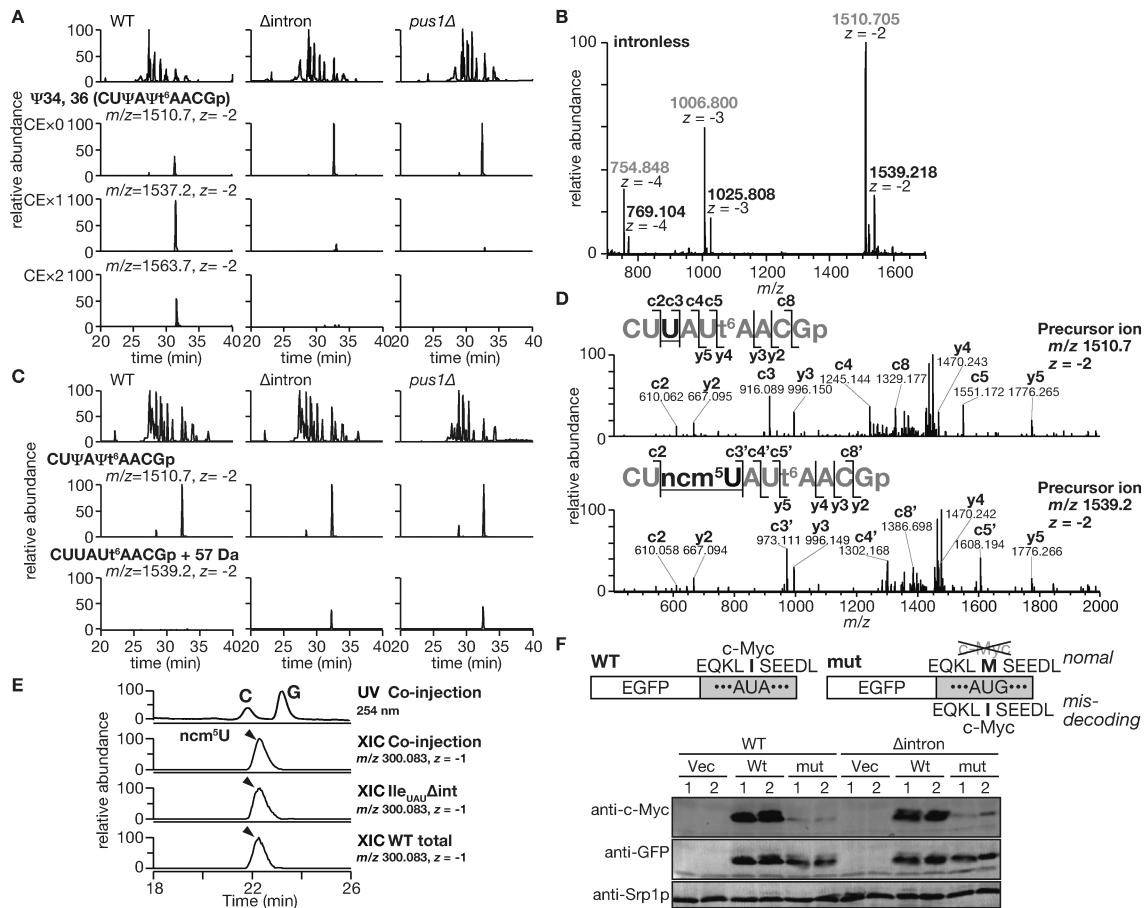

of all the 10 tRNAs. Surprisingly, the levels of 5.8S rRNA were reduced in the intronless mutants of tRNA<sup>Leu</sup><sub>CAA</sub> and tRNA<sup>Phe</sup>, and 27S rRNA intermediates were slightly accumulated in these mutants (Figure 4B). Especially, the tRNA<sup>Phe</sup> intronless but not tRNA<sup>Leu</sup><sub>CAA</sub> intronless mutant accumulated the 27SA<sub>2</sub> rRNA intermediate. The intronless mutant of tRNA<sup>Leu</sup><sub>CAA</sub> showed a weak but apparent abnormality in nucleolar morphology (Figure 4C). As expected from *in vitro* studies (15,16), pseudouridylation of U34 and U36 on tRNA<sup>Ile</sup><sub>UAU</sub> was also intron-dependent *in vivo*, and

tRNA<sup>Ile</sup><sub>UAU</sub> derived from the intronless genes underwent an unpredicted ncm<sup>5</sup>U34 modification.

Intron removal reduced the tRNA amount in three out of ten mutants by 23–33% (Figure 3). This may come from either transcriptional repression and/or enhancement of degradation. Although distance between the two internal promoter elements, box A and box B, in the tRNA genes has only a minor effect on recognition by TFIIB and TFIIC, because of the flexibility of these complexes (41), the absence or presence of the intron in a tRNA gene alters

its ability of the tRNA gene to act as an insulator, a barrier for spreading of silenced chromatin, via stable recruitment of TFIIC and condensin (42–44). Indeed, wild-type *SUP53* (one of the tRNA<sup>Leu</sup><sub>CAA</sub> genes) itself has no insulator activity when positioned downstream of the *HMR* silencer, but its intronless allele can stop the spread of silencing from the silencer (44), meaning that the presence of the intron somehow compromises proper recruitment of TFIIC and condensin on the tRNA<sup>Leu</sup><sub>CAA</sub> genes to build an insulator. These facts suggest that altering the distance between box A and box B by removing the intron may affect transcription factor recruitment and transcription efficiency, resulting in a reduction in tRNA levels observed in Figure 3. Since all the intronless mutants displayed steady state levels of tRNA aminoacylation similar to those of the wild-type strains (Supplementary Figure S2) and exhibited normal polysome/monosome ratios (Supplementary Figure S3), the aminoacyl-tRNAs derived from the intronless alleles seem to be produced and utilized properly. Thus, we consider that intron removal confers only minor impacts on the functions of tRNAs in translation.

To our surprise, the tRNA<sup>Leu</sup><sub>CAA</sub> intronless mutant had reduced levels of 5.8S rRNA and abnormality in nucleolar morphology despite its normal growth under laboratory conditions (Figures 1, 2 and 4). It is well known that tRNA genes prefer to locate near the nucleolus (36,45), and, as mentioned above, the presence of an intron in a tRNA gene can affect its function as an insulator (42). Therefore, removal of intron from a major group of tRNA genes, such as 9–10 synonymous genes encoding tRNA<sup>Leu</sup><sub>CAA</sub>, may affect structural organization of the nucleolus or the perinucleolar region via alteration of chromosome organization and/or chromatin status by introducing new insulators. In *S. cerevisiae*, a bulged nucleus, in which the nucleolus slightly stays away from the nucleoplasm, is thought to be an intermediated step between flared and round nuclei during mitosis, and is often observed in mitotically arrested cells (46,47). The abnormal nucleolar shape observed in the tRNA<sup>Leu</sup><sub>CAA</sub> mutant may be related to this phenomenon, and can be interpreted as retardation of a certain step of nucleolar dynamism during cell cycle progression. This kind of abnormality may cause a slight slowdown of some rRNA processing events in the nucleolus. We observed the major accumulation of the 27SA<sub>2</sub> rRNA intermediate, which is specifically recognized by probe a, only in the tRNA<sup>Phe</sup> intronless mutant but not in the tRNA<sup>Leu</sup><sub>CAA</sub> intronless mutant. On the other hand, the total amount of several ~27S rRNA intermediates including 27SA<sub>2</sub>, 27SA<sub>3</sub>, 27SB<sub>L</sub> and 27SB<sub>S</sub> slightly increased in both the tRNA<sup>Leu</sup><sub>CAA</sub> and tRNA<sup>Phe</sup> intronless mutants (Figure 4B). Thus, intron removal from tRNA genes of certain types may have tRNA-type specific effects on nuclear/nucleolar functions in rRNA maturation. In addition to our findings, several reports have demonstrated that defects in the pre-tRNA splicing machinery compromise rRNA processing; Sen34p depletion results in delayed pre-rRNA processing (48), and mitochondrial-located Sen2p is required for efficient pre-rRNA processing (49). Thus, the status of tRNA intermediates in the nucleus might also affect the efficient production of rRNA.

We confirmed intron-dependent pseudouridylation of tRNA<sup>Ile</sup><sub>UAU</sub> *in vivo*. Surprisingly, a considerable portion of tRNA<sup>Ile</sup><sub>UAU</sub> produced from the intronless allele underwent aberrant ncm<sup>5</sup>U modification at the wobble position (Figure 5). Thus, the tRNA<sup>Ile</sup><sub>UAU</sub> intron acts as a positive key to allow U34 pseudouridylation and a negative key to exclude U34 5-carbamoylmethylation. The same ncm<sup>5</sup>U modification was observed in the *pus1*Δ strain, in which intron-containing pre-tRNA<sup>Ile</sup><sub>UAU</sub> was transcribed as the wild-type. Eleven proteins including the Elp complex (Elp1–6p) required for 5-carbamoylmethylation of U34 in tRNAs are localized in the nucleus (50,51). Because the Elp complex does not seem to recognize intron-containing pre-tRNA<sup>Ile</sup><sub>UAU</sub>, its 5-carbamoylmethylation in the *pus1*Δ cells must take place after splicing, which occurs in the cytoplasm near mitochondria in *S. cerevisiae* (28). Consequently, ncm<sup>5</sup>U34 acquired in the *pus1*Δ cells should be the results of retrograde transport of spliced tRNA<sup>Ile</sup><sub>UAU</sub> from the cytoplasm (52,53), like the case of N1-methylation of G37 on tRNA<sup>Phe</sup> by Trm5p during wybutosine formation (54). Thus, for tRNA<sup>Ile</sup><sub>UAU</sub>, having an intron at the canonical position is not sufficient to avoid unwanted 5-carbamoylmethylation of U34, but efficient pseudouridylation of that position by Pus1p before recognition of the spliced anticodon by the Elp complex is also essential (Figure 6, upper panel; the wild-type cell). Loss of the introns from the tRNA<sup>Ile</sup><sub>UAU</sub> genes results in loss of these ‘double stoppers’ against the Elp complex to yield the aberrant modification (Figure 6, lower panel; the intronless mutant cell). In other words, the tRNA intron controls priority of modification enzymes acting on the corresponding tRNA. Although Ψ and ncm<sup>5</sup>U are predicted to have opposite effects on the wobble decoding (38,39), the tRNA<sup>Ile</sup><sub>UAU</sub> intronless cells normally distinguished the AUA codon from the AUG codon in our reporter system (Figure 5F). Because the minor tRNA<sup>Ile</sup><sub>UAU</sub> containing the ncm<sup>5</sup>UAU anticodon has to compete with the abundant tRNA<sup>Met</sup><sub>elongation</sub> for recognition of AUG codons, it is possible that a low level of tRNA<sup>Ile</sup><sub>ncm5UAU</sub> was not sufficient to compete for AUG-decoding in our experiments. We also examined translation of our EGFP-c-Myc reporters in tRNA<sup>Ile</sup><sub>UAU</sub>-overproducing strains, but saw no enhancement of AUG-to-Ile misdecoding, suggesting that ncm<sup>5</sup>U34 on tRNA<sup>Ile</sup><sub>UAU</sub> has a minimal impact on decoding specificity of this tRNA on our reporter mRNA (data not shown). Since we did not measure how much of total tRNA<sup>Ile</sup><sub>UAU</sub> was modified into the tRNA<sup>Ile</sup><sub>ncm5UAU</sub> form in this intronless tRNA<sup>Ile</sup><sub>UAU</sub> overproducer, it is possible that only a very small portion of the tRNA receives ncm<sup>5</sup>U34 in this strain. Nevertheless, we think that our inability to detect misdecoding of AUG to Ile in our reporter system cannot be simply attributed to the molar ratio between tRNA<sup>Ile</sup><sub>ncm5UAU</sub> and tRNA<sup>Met</sup><sub>elongation</sub>. In some organisms, non-modified U34 in tRNA<sup>Ile</sup><sub>UAU</sub> can distinguish between AUA and AUG at the ribosomal A site (55), meaning that the overall structure of tRNA<sup>Ile</sup><sub>UAU</sub> has an additional role in exact discrimination between A and G at the wobble position. Such an effect might dominate codon recognition even in the case of yeast tRNA<sup>Ile</sup><sub>ncm5UAU</sub>. To obtain the final answer of the effect of this altered modification, further *in vivo* analyses

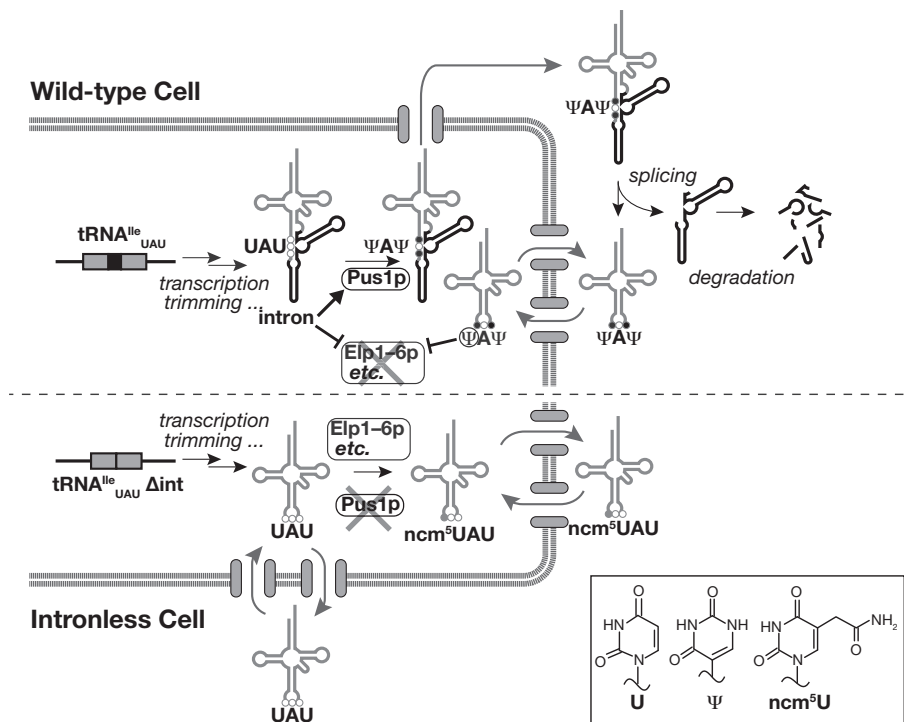

**Figure 6.** Physiological functions of introns in tRNA maturation. Schematic representation of the physiological functions of introns in tRNA maturation in *Saccharomyces cerevisiae*. Maturation of tRNA<sup>Ile</sup><sub>UAU</sub> in the wild-type yeast (upper) and the intronless (lower) cells is shown as an example. The gray and black parts of the tRNA represent two exons and an intron, respectively. The three circles represent the anticodon; open circle, unmodified nucleotide; black filled circle, Ψ introduced by Pus1p; gray filled circle, ncm<sup>5</sup>U introduced by the Elp complex and other factors. The chemical structures of U and its derivatives are shown in the inset. The thin black arrows represent reactions related to tRNA biosynthesis and maturation. The gray arrows represent intracellular dynamics of tRNA species during maturation. The intron of tRNA<sup>Ile</sup><sub>UAU</sub> promotes U34-to-Ψ34 modification but suppresses ncm<sup>5</sup>U34 formation during the early maturation step in the nucleus. Note that spliced tRNA<sup>Ile</sup><sub>UAU</sub> without Ψ modification, which is produced in *pus1Δ* cells, can be a substrate for ncm<sup>5</sup>U modification enzymes after its retrograde movement into the nucleus, but this feature is not shown in the figure for simplicity. Thus, Ψ34 formation is also essential for full protection against ncm<sup>5</sup>U34 mismodification.

of the translome/proteome from the whole mRNA transcriptome in the mutant yeast or *in vitro* analyses of decoding of AUA and AUG codons by tRNA<sup>Ile</sup><sub>UAU</sub> variants are required.

Previous studies reported that tRNA<sup>Leu</sup><sub>CAA</sub> and tRNA<sup>Tyr</sup> undergo intron-dependent modifications (17,56). During our aminoacylation analysis of tRNAs, we found that removal of the intron from the *tX(XXX)D* locus, which may encode tRNA<sup>Ser</sup><sub>GCU</sub> produced an unexpected tRNA species that migrated slightly faster than normal tRNA<sup>Ser</sup><sub>GCU</sub> on the acid-urea gel. The unexpected tRNA was aminoacylated and migrated to a position similar to that of authentic tRNA<sup>Ser</sup><sub>GCU</sub> in TBE-based gel electrophoresis, suggesting that some alkali-labile modification but still resistance to treatment at pH 9.0 and at 37°C might cause difference in electrophoretic mobility in the acid-urea PAGE. Alternatively, this new modification may introduce a functional group with pK<sub>a</sub> between 8.3 (the pH of TBE-based PAGE) and 5.0 (the pH of acidic PAGE), and the protonation state of the functional group affects electrophoretic mobility of the tRNA. Although the precise chemical natures of this new molecular species are still to be analyzed, it is possible that this modification on tRNA<sup>Ser</sup><sub>GCU</sub>-like RNA is usually prevented by the canonical intron. The triple intron-deletion mutant of tRNA<sup>Ser</sup><sub>GCU</sub> [*ts(gcu)fΔint ts(gcu)oΔint tx(XXX)lΔint*] did not produce the unknown

fast-migrating species migrating faster in acid-urea-PAGE despite the fact that *tX(XXX)L* and *tX(XXX)D* have the same coding sequences. At present, we do not have enough pieces of evidence to explain this result precisely. One possible explanation is that the *tX(XXX)L* locus is somehow inactivated on the yeast chromosome and only *tX(XXX)D* is active. The set of our intronless mutants generated here will be valuable to analyze both intron-dependent modifications and modification avoidance in the nucleus by the introns.

In summary, this and previous reports clearly showed that the introns in genes encoding tRNAs on *S. cerevisiae*'s genome are dispensable for yeast viability, and their removal have minimal impacts on tRNA levels and functionality. However, some tRNA intronless mutants exhibit specific phenotypes related to various physiological aspects. Intron removal from the genes encoding certain tRNA species, such as tRNA<sup>Tyr</sup> and tRNA<sup>Phe</sup>, causes growth defects under respiratory conditions. Is there any relation between these growth phenotypes and mitochondrial localization of splicing machinery in the yeast? We are also wondering why the intronless mutant of tRNA<sup>Leu</sup><sub>CAA</sub> shows defects in 5.8S rRNA production and nucleolar morphology. The intron of tRNA<sup>Ile</sup><sub>UAU</sub>, and probably others, appears to control anticodon modification both positively and negatively. Still we do not have complete explanation of relationship between

the growth defects and other individual phenotypes. However, these unexpected findings in the intronless mutants provide clues for novel interaction of the tRNA introns with respiration, the complexity of RNA modifications, and ribosomal properties, etc. The findings will also bring other unknown cellular roles of the introns to light. Further studies are required to understand the detailed functionalities of tRNA introns and their mechanisms of action, and our intronless strains constructed here will be powerful tools for this expedition.

## SUPPLEMENTARY DATA

Supplementary Data are available at NAR Online.

## ACKNOWLEDGEMENTS

We thank to our current and previous lab members for their support, especially, Prof. Toshiya Endo in Kyoto Sangyo University and Prof. Shuichi Nishikawa in Niigata University for fruitful discussion. We also thank to Ryota Ibusuki for preliminary analysis of possibility of AUG misdecoding by intronless tRNA<sup>Leu</sup><sub>UAU</sub>.

## FUNDING

KAKENHI for Scientific Research (C), Japan Society for the Promotion of Science [JP17K07289, JP17KT0113]; KAKENHI for Scientific Research on Innovative Areas, Ministry of Education, Culture, Sports, Science and Technology Japan [JP17H05672]; Hyogo Science and Technology Association, Japan [28144]. Funding for open access charge: JSPS.

*Conflict of interest statement.* None declared.

## REFERENCES

- Kirchner, S. and Ignatova, Z. (2015) Emerging roles of tRNA in adaptive translation, signalling dynamics and disease. *Nat. Rev. Genet.*, **16**, 98–112.
- Hani, J. and Feldmann, H. (1998) tRNA genes and retroelements in the yeast genome. *Nucleic Acids Res.*, **26**, 689–696.
- Chan, P.P. and Lowe, T.M. (2016) GtRNAdb 2.0: an expanded database of transfer RNA genes identified in complete and draft genomes. *Nucleic Acids Res.*, **44**, D184–D189.
- Heinemann, I.U., Söll, D. and Randau, L. (2010) Transfer RNA processing in archaea: unusual pathways and enzymes. *FEBS Lett.*, **584**, 303–309.
- Fujishima, K. and Kanai, A. (2014) tRNA gene diversity in the three domains of life. *Front. Genet.*, **5**, 142.
- Yoshihisa, T. (2014) Handling tRNA introns, archaeal way and eukaryotic way. *Front. Genet.*, **5**, 213.
- Trotta, C.R., Miao, F., Arn, E.A., Stevens, S.W., Ho, C.K., Rauhut, R. and Abelson, J.N. (1997) The yeast tRNA splicing endonuclease: a tetrameric enzyme with two active site subunits homologous to the archaeal tRNA endonucleases. *Cell*, **89**, 849–858.
- Phizicky, E.M., Schwartz, R.C. and Abelson, J. (1986) *Saccharomyces cerevisiae* tRNA ligase. Purification of the protein and isolation of the structural gene. *J. Biol. Chem.*, **261**, 2978–2986.
- Culver, G.M., McCraith, S.M., Consaul, S.A., Stanford, D.R. and Phizicky, E.M. (1997) A 2'-phosphotransferase implicated in tRNA splicing is essential in *Saccharomyces cerevisiae*. *J. Biol. Chem.*, **272**, 13203–13210.
- Kosmaczewski, S.G., Edwards, T.J., Han, S.M., Eckwahl, M.J., Meyer, B.I., Peach, S., Hesselberth, J.R., Wolin, S.L. and Hammarlund, M. (2014) The RtcB RNA ligase is an essential component of the metazoan unfolded protein response. *EMBO Rep.*, **15**, 1278–1285.
- Yang, K.J., Guo, L., Hou, X.L., Gong, H.-Q. and Liu, C.-M. (2017) ZYGOTE-ARREST 3 that encodes the tRNA ligase is essential for zygote division in *Arabidopsis*. *J. Integr. Plant Biol.*, **59**, 680–692.
- Wu, J. and Hopper, A.K. (2014) Healing for destruction: tRNA intron degradation in yeast is a two-step cytoplasmic process catalyzed by tRNA ligase Rlg1 and 5'-to-3' exonuclease Xrn1. *Genes Dev.*, **28**, 1556–1561.
- Fujishima, K., Sugahara, J., Kikuta, K., Hirano, R., Sato, A., Tomita, M. and Kanai, A. (2009) Tri-split tRNA is a transfer RNA made from 3 transcripts that provides insight into the evolution of fragmented tRNAs in archaea. *Proc. Natl. Acad. Sci. U.S.A.*, **106**, 2683–2687.
- Clouet d'Orval, B., Bortolin, M.L., Gaspin, C. and Bachellerie, J.P. (2001) Box C/D RNA guides for the ribose methylation of archaeal tRNAs. The tRNA<sup>Trp</sup> intron guides the formation of two ribose-methylated nucleosides in the mature tRNA<sup>Trp</sup>. *Nucleic Acids Res.*, **29**, 4518–4529.
- Szweykowska-Kulinska, Z., Senger, B., Keith, G., Fasiolo, F. and Grosjean, H. (1994) Intron-dependent formation of pseudouridines in the anticodon of *Saccharomyces cerevisiae* minor tRNA<sup>Leu</sup>. *EMBO J.*, **13**, 4636–4644.
- Motorin, Y., Keith, G., Simon, C., Foiret, D., Simos, G., Hurt, E. and Grosjean, H. (1998) The yeast tRNA:pseudouridine synthase Pus1p displays a multisite substrate specificity. *RNA*, **4**, 856–869.
- Motorin, Y. and Grosjean, H. (1999) Multisite-specific tRNA:m<sup>5</sup>C-methyltransferase (Trm4) in yeast *Saccharomyces cerevisiae*: identification of the gene and substrate specificity of the enzyme. *RNA*, **5**, 1105–1118.
- Brzezicha, B., Schmidt, M., Makalowska, I., Jarmolowski, A., Pienkowska, J. and Szweykowska-Kulinska, Z. (2006) Identification of human tRNA:m<sup>5</sup>C methyltransferase catalysing intron-dependent m<sup>5</sup>C formation in the first position of the anticodon of the pre-tRNA<sup>Leu</sup><sub>(CAA)</sub>. *Nucleic Acids Res.*, **34**, 6034–6043.
- Agris, P.F., Eruysal, E.R., Narendran, A., Väre, V.Y.P., Vangaveti, S. and Ranganathan, S.V. (2018) Celebrating wobble decoding: Half a century and still much is new. *RNA Biol.*, **15**, 537–553.
- Ranjan, N. and Rodnina, M.V. (2016) tRNA wobble modifications and protein homeostasis. *Translation (Austin)*, **4**, e143076.
- Ho, C.K. and Abelson, J. (1988) Testing for intron function in the essential *Saccharomyces cerevisiae* tRNA<sup>Ser</sup><sub>(UCG)</sub> gene. *J. Mol. Biol.*, **202**, 667–672.
- Joardar, A., Gurha, P., Skariah, G. and Gupta, R. (2008) Box C/D RNA-guided 2'-O methylations and the intron of tRNA<sup>Trp</sup> are not essential for the viability of *Haloflexax volcanii*. *J. Bacteriol.*, **190**, 7308–7313.
- Mori, S., Kajita, T., Endo, T. and Yoshihisa, T. (2011) The intron of tRNA-<sup>Trp</sup><sub>CCA</sub> is dispensable for growth and translation of *Saccharomyces cerevisiae*. *RNA*, **17**, 1760–1769.
- Brachmann, C.B., Davies, A., Cost, G.J., Caputo, E., Li, J., Hieter, P. and Boeke, J.D. (1998) Designer deletion strains derived from *Saccharomyces cerevisiae* S288C: a useful set of strains and plasmids for PCR-mediated gene disruption and other applications. *Yeast*, **14**, 115–132.
- Gietz, R.D., Schiestl, R.H., Willems, A.R. and Woods, R.A. (1995) Studies on the transformation of intact yeast cells by the LiAc/SS-DNA/PEG procedure. *Yeast*, **11**, 355–360.
- Akada, R., Hirosawa, I., Kawahata, M., Hoshida, H. and Nishizawa, Y. (2002) Sets of integrating plasmids and gene disruption cassettes containing improved counter-selection markers designed for repeated use in budding yeast. *Yeast*, **19**, 393–402.
- Adams, A., Gottschling, D., Kaiser, C. and Stearns, T. (1997) *Methods in Yeast Genetics, A Cold Spring Harbor Laboratory Course Manual*. 1997 edition. Cold Spring Harbor Laboratory Press, NY.
- Yoshihisa, T., Yunoki-Esaki, K., Ohshima, C., Tanaka, N. and Endo, T. (2003) Possibility of cytoplasmic pre-tRNA splicing: the yeast tRNA splicing endonuclease mainly localizes on the mitochondria. *Mol. Biol. Cell*, **14**, 3266–3279.
- Steiner-Mosonyi, M., Leslie, D.M., Dehghani, H., Aitchison, J.D. and Mangroo, D. (2003) Utp8p is an essential intranuclear component of the nuclear tRNA export machinery of *Saccharomyces cerevisiae*. *J. Biol. Chem.*, **278**, 32236–32245.
- Suzuki, T. and Suzuki, T. (2007) Chaplet column chromatography: isolation of a large set of individual RNAs in a single step. *Methods Enzymol.*, **425**, 231–239.

31. Ohira, T. and Suzuki, T. (2016) Precursors of tRNAs are stabilized by methylguanosine cap structures. *Nat. Chem. Biol.*, **12**, 648–655.
32. Suzuki, T., Ikeuchi, Y., Noma, A., Suzuki, T. and Sakaguchi, Y. (2007) Mass spectrometric identification and characterization of RNA-modifying enzymes. *Methods Enzymol.*, **425**, 211–229.
33. Mengel-Jørgensen, J. and Kirpekar, F. (2002) Detection of pseudouridine and other modifications in tRNA by cyanoethylation and MALDI mass spectrometry. *Nucleic Acids Res.*, **30**, e135.
34. Sakaguchi, Y., Miyauchi, K., Kang, B.-i and Suzuki, T. (2015) Nucleoside analysis by hydrophilic interaction liquid chromatography coupled with mass spectrometry. *Methods Enzymol.*, **560**, 19–28.
35. Yaffe, M.P. and Schatz, G. (1984) Two nuclear mutations that block mitochondrial protein import in yeast. *Proc. Natl. Acad. Sci. U.S.A.*, **81**, 4819–4823.
36. Thompson, M., Haeusler, R.A., Good, P.D. and Engelke, D.R. (2003) Nucleolar clustering of dispersed tRNA genes. *Science*, **302**, 1399–1401.
37. Kressler, D., De La Cruz, J., Rojo, M. and Linder, P. (1997) Fall p is an essential DEAD-box protein involved in 40S-ribosomal-subunit biogenesis in *Saccharomyces cerevisiae*. *Mol. Cell. Biol.*, **17**, 7283–7294.
38. Senger, B., Auxilien, S., Englisch, U., Cramer, F. and Fasiolo, F. (1997) The modified wobble base inosine in yeast tRNA<sup>Ile</sup> is a positive determinant for aminoacylation by isoleucyl-tRNA synthetase. *Biochemistry*, **36**, 8269–8275.
39. Johansson, M.J., Esberg, A., Huang, B., Björk, G.R. and Byström, A.S. (2008) Eukaryotic wobble uridine modifications promote a functionally redundant decoding system. *Mol. Cell. Biol.*, **28**, 3301–3312.
40. Cherry, P.D., White, L.K., York, K. and Hesselberth, J.R. (2018) Genetic bypass of essential RNA repair enzymes in budding yeast. *RNA*, **24**, 313–323.
41. Nagarajavel, V., Iben, J.R., Howard, B.H., Maraia, R.J. and Clark, D.J. (2013) Global ‘bootprinting’ reveals the elastic architecture of the yeast TFIIB-TFIIC transcription complex *in vivo*. *Nucleic Acids Res.*, **41**, 8135–8143.
42. Donze, D., Adams, C.R., Rine, J. and Kamakaka, R.T. (1999) The boundaries of the silenced *HMR* domain in *Saccharomyces cerevisiae*. *Genes Dev.*, **13**, 698–708.
43. D’Ambrosio, C., Schmidt, C.K., Katou, Y., Kelly, G., Itoh, T., Shirahige, K. and Uhlmann, F. (2008) Identification of *cis*-acting sites for condensin loading onto budding yeast chromosomes. *Genes Dev.*, **22**, 2215–2227.
44. Donze, D. and Kamakaka, R.T. (2001) RNA polymerase III and RNA polymerase II promoter complexes are heterochromatin barriers in *Saccharomyces cerevisiae*. *EMBO J.*, **20**, 520–531.
45. Belagal, P., Normand, C., Shukla, A., Wang, R., Léger-Silvestre, I., Dez, C., Bhargava, P. and Gadal, O. (2016) Decoding the principles underlying the frequency of association with nucleoli for RNA polymerase III-transcribed genes in budding yeast. *Mol. Biol. Cell*, **27**, 3164–3177.
46. Witkin, K.L., Chong, Y., Shao, S., Webster, M.T., Lahiri, S., Walters, A.D., Lee, B., Koh, J.L., Prinz, W.A., Andrews, B.J. *et al.* (2012) The budding yeast nuclear envelope adjacent to the nucleolus serves as a membrane sink during mitotic delay. *Curr. Biol.*, **22**, 1128–1133.
47. Walters, A.D., May, C.K., Dauster, E.S., Cinquin, B.P., Smith, E.A., Robellet, X., D’Amours, D., Larabell, C.A. and Cohen-Fix, O. (2014) The yeast polo kinase Cdc5 regulates the shape of the mitotic nucleus. *Curr. Biol.*, **24**, 2861–2867.
48. Volta, V., Ceci, M., Emery, B., Bachi, A., Petfalski, E., Tollervey, D., Linder, P., Marchisio, P.C., Piatti, S. and Biffo, S. (2005) Sen34p depletion blocks tRNA splicing *in vivo* and delays rRNA processing. *Biochem. Biophys. Res. Commun.*, **337**, 89–94.
49. Dhungel, N. and Hopper, A.K. (2012) Beyond tRNA cleavage: novel essential function for yeast tRNA splicing endonuclease unrelated to tRNA processing. *Genes Dev.*, **26**, 503–514.
50. Huang, B., Johansson, M.J.O. and Byström, A.S. (2005) An early step in wobble uridine tRNA modification requires the Elongator complex. *RNA*, **11**, 424–436.
51. Huang, B., Lu, J. and Byström, A.S. (2008) A genome-wide screen identifies genes required for formation of the wobble nucleoside 5-methoxycarbonylmethyl-2-thiouridine in *Saccharomyces cerevisiae*. *RNA*, **14**, 2183–2194.
52. Takano, A., Endo, T. and Yoshihisa, T. (2005) tRNA actively shuttles between the nucleus and cytosol in yeast. *Science*, **309**, 140–142.
53. Shaheen, H.H. and Hopper, A.K. (2005) Retrograde movement of tRNAs from the cytoplasm to the nucleus in *Saccharomyces cerevisiae*. *Proc. Natl. Acad. Sci. U.S.A.*, **102**, 11290–11295.
54. Ohira, T. and Suzuki, T. (2011) Retrograde nuclear import of tRNA precursors is required for modified base biogenesis in yeast. *Proc. Natl. Acad. Sci. U.S.A.*, **108**, 10502–10507.
55. Taniguchi, T., Miyauchi, K., Nakane, D., Miyata, M., Muto, A., Nishimura, S. and Suzuki, T. (2013) Decoding system for the AUA codon by tRNA<sup>Ile</sup> with the UAU anticodon in *Mycoplasma mobile*. *Nucleic Acids Res.*, **41**, 2621–2631.
56. Johnson, P.F. and Abelson, J. (1983) The yeast tRNA<sup>Tyr</sup> gene intron is essential for correct modification of its tRNA product. *Nature*, **302**, 681–687.
